# Supplementary material
Source: MDPI journal article supplement (https://www.mdpi.com/1424-2818/12/12/485)
Supplement: s1 [file s1]

## Sheet: Pairwise
	Table S1. Pairwise comparisons for community structure, and structural and functional parameters of the nematode community. Only pairwise comparisons are shown for those main factors and interactions that showed significant differences in the 3-way PERMANOVA test.
	Pairwise comparisons for main factor Season were not included as there are only two levels; if the main test main for Season was significant then so was the pairwise comparison.
	Shannon diversity is not shows as there were no significant PERMANOVA results other than for the main factor Season.
	WD: Water Depth; EG(51): expected number of genera based on 51 individuals; N1, N2, Ninf: Hill’s diversity numbers; MI: Maturity Index; TDI: Trophic Diversity Index. Bold values denote significant results (p<0.05).
	Genus Richness					EG(51)					N1					N2					Ninf					Density					Biomass					TDI					MI					Community
	WD	t	P(perm)	perms		WD	t	P(perm)	perms		Transect	t	P(perm)	perms		WD	t	P(perm)	perms		WD	t	P(perm)	perms		WD	t	P(perm)	perms		WD	t	P(perm)	perms		WD	t	P(perm)	perms		WD	t	P(perm)	perms		WD	t	P(perm)	perms
	400, 1000	1.166	0.252	998		400, 1000	0.24561	0.801	996		A, B	2.6668	0.0112	9826		400, 1000	0.77713	0.454	995		400, 1000	0.4228	0.677	997		400, 1000	1.989	0.07	995		400, 1000	1.4895	0.17	997		400, 1000	2.3907	0.024	997		400, 1000	0.18709	0.834	995		400, 1000	3.0481	0.001	998
	400, 1900	3.0291	0.005	994		400, 1900	3.353	0.001	996		A, C	1.4039	0.1564	9847		400, 1900	3.3335	0.005	994		400, 1900	3.1536	0.002	997		400, 1900	10.364	0.001	995		400, 1900	10.143	0.001	997		400, 1900	5.8166	0.001	999		400, 1900	5.5089	0.001	997		400, 1900	6.0594	0.001	997
	400, 2500	5.7122	0.001	999		400, 2500	1.7159	0.081	998		A, D	1.9231	0.0638	9845		400, 2500	4.2353	0.001	996		400, 2500	4.7621	0.001	994		400, 2500	10.425	0.001	996		400, 2500	10.302	0.001	997		400, 2500	3.2853	0.002	998		400, 2500	7.1697	0.001	997		400, 2500	6.0309	0.001	998
	400, 3000	4.7273	0.001	999		400, 3000	2.4407	0.022	998		A, E	0.61541	0.5431	9830		400, 3000	3.8107	0.001	999		400, 3000	4.2845	0.001	996		400, 3000	10.384	0.001	996		400, 3000	10.222	0.001	997		400, 3000	5.197	0.001	995		400, 3000	5.9986	0.001	997		400, 3000	6.1058	0.001	998
	1000, 1900	3.7999	0.001	997		1000, 1900	2.9773	0.007	996		B, C	1.2077	0.2189	9841		1000, 1900	1.6995	0.109	996		1000, 1900	1.9593	0.054	996		1000, 1900	9.096	0.001	998		1000, 1900	8.6146	0.001	997		1000, 1900	2.9352	0.004	994		1000, 1900	6.0411	0.001	998		1000, 1900	5.4809	0.001	998
	1000, 2500	6.1878	0.001	999		1000, 2500	1.3865	0.158	995		B, D	0.7407	0.4564	9858		1000, 2500	2.4456	0.018	996		1000, 2500	3.2982	0.002	999		1000, 2500	9.1608	0.001	997		1000, 2500	8.7841	0.001	997		1000, 2500	0.4153	0.674	996		1000, 2500	8.0743	0.001	992		1000, 2500	5.7051	0.001	998
	1000, 3000	5.2492	0.001	997		1000, 3000	2.1624	0.041	996		B, E	3.2978	0.0028	9838		1000, 3000	2.3487	0.03	998		1000, 3000	3.088	0.008	999		1000, 3000	9.1973	0.001	995		1000, 3000	8.7532	0.001	998		1000, 3000	2.2178	0.04	994		1000, 3000	6.3495	0.001	995		1000, 3000	5.8738	0.001	999
	1900, 2500	2.6188	0.016	995		1900, 2500	1.9043	0.059	999		C, D	0.48626	0.6331	9834		1900, 2500	1.2265	0.219	997		1900, 2500	2.0203	0.039	995		1900, 2500	0.73953	0.46	998		1900, 2500	1.4222	0.158	998		1900, 2500	3.2277	0.003	997		1900, 2500	1.4435	0.158	998		1900, 2500	2.5243	0.001	998
	1900, 3000	1.9254	0.053	996		1900, 3000	0.080837	0.935	996		C, E	1.184	0.2405	9826		1900, 3000	1.251	0.236	997		1900, 3000	1.8812	0.059	995		1900, 3000	2.4774	0.013	998		1900, 3000	3.1122	0.002	996		1900, 3000	1.1322	0.299	999		1900, 3000	1.2474	0.217	995		1900, 3000	2.5773	0.001	999
	2500, 3000	0.48738	0.618	997		2500, 3000	1.3758	0.184	999		D, E	1.9155	0.0567	9816		2500, 3000	0.26661	0.781	995		2500, 3000	0.16075	0.873	992		2500, 3000	1.1841	0.238	999		2500, 3000	1.0199	0.315	998		2500, 3000	2.3739	0.027	997		2500, 3000	0.063953	0.952	996		2500, 3000	1.8239	0.001	997
	WD within WD x Transect	t	P(perm)	perms		Transect	t	P(perm)	perms							Transect	t	P(perm)	perms		WD within WD x Tr	t	P(perm)	perms		Transect	t	P(perm)	perms		Transect	t	P(perm)	perms		WD within WD x Tr	t	P(perm)	perms		Transect	t	P(perm)	perms		Transect	t	P(perm)	perms
	Transect A (400, 1000)	0.81389	0.513	979		A, B	3.1418	0.005	997							A, B	2.8482	0.01	997		Transect A (400, 1000)	0.6778	0.518	989		A, B	2.295	0.019	996		A, B	1.3887	0.178	998		Transect A (400, 1000)	0.8295	0.419	981		A, B	2.0465	0.054	999		A, B	1.7731	0.001	998
	Transect A (400, 1900)	2.8483	0.025	909		A, C	1.8416	0.072	997							A, C	1.409	0.185	996		Transect A (400, 1900)	2.8913	0.027	985		A, C	4.0135	0.001	999		A, C	3.3535	0.002	999		Transect A (400, 1900)	4.4291	0.004	979		A, C	3.1316	0.003	999		A, C	1.8255	0.001	999
	Transect A (400, 2500)	2.8659	0.011	969		A, D	2.7312	0.01	995							A, D	2.5598	0.022	997		Transect A (400, 2500)	0.32606	0.747	981		A, D	2.4289	0.018	998		A, D	1.5038	0.122	997		Transect A (400, 2500)	3.0748	0.015	980		A, D	2.879	0.009	999		A, D	2.0182	0.001	999
	Transect A (400, 3000)	2.5237	0.017	937		A, E	1.7569	0.089	999							A, E	0.83274	0.439	997		Transect A (400, 3000)	0.26992	0.784	975		A, E	3.5456	0.001	999		A, E	3.813	0.001	998		Transect A (400, 3000)	3.4285	0.01	984		A, E	2.7532	0.002	999		A, E	2.1013	0.001	999
	Transect A (1000, 1900)	2.1824	0.067	989		B, C	1.0442	0.309	998							B, C	1.3017	0.205	995		Transect A (1000, 1900)	1.7806	0.115	987		B, C	2.181	0.029	998		B, C	2.4744	0.012	993		Transect A (1000, 1900)	2.4788	0.058	988		B, C	1.0112	0.323	996		B, C	1.2183	0.065	998
	Transect A (1000, 2500)	2.2579	0.055	987		B, D	0.1965	0.836	998							B, D	0.11894	0.904	998		Transect A (1000, 2500)	0.78312	0.451	985		B, D	0.41619	0.675	997		B, D	0.35249	0.734	999		Transect A (1000, 2500)	1.6494	0.155	992		B, D	0.46827	0.658	998		B, D	1.2808	0.027	999
	Transect A (1000, 3000)	2.2499	0.056	971		B, E	1.9749	0.057	997							B, E	3.1745	0.002	995		Transect A (1000, 3000)	0.37335	0.714	982		B, E	1.4622	0.143	997		B, E	3.1012	0.003	999		Transect A (1000, 3000)	1.871	0.103	981		B, E	0.60352	0.585	997		B, E	1.4153	0.003	999
	Transect A (1900, 2500)	0.2062	0.852	974		C, D	0.78713	0.427	997							C, D	1.1047	0.266	998		Transect A (1900, 2500)	2.2631	0.055	982		C, D	1.15	0.276	997		C, D	1.3413	0.202	996		Transect A (1900, 2500)	0.73862	0.5	978		C, D	0.69237	0.493	999		C, D	1.3254	0.011	997
	Transect A (1900, 3000)	0.6415	0.59	923		C, E	0.40376	0.676	997							C, E	0.94666	0.362	994		Transect A (1900, 3000)	1.7223	0.107	983		C, E	0.95863	0.379	998		C, E	0.99487	0.319	998		Transect A (1900, 3000)	0.60315	0.585	985		C, E	0.43665	0.675	998		C, E	1.4774	0.002	996
	Transect A (2500, 3000)	0.46738	0.652	969		D, E	1.4205	0.145	997							D, E	2.4969	0.018	998		Transect A (2500, 3000)	0.42234	0.689	987		D, E	0.62153	0.587	994		D, E	1.845	0.081	996		Transect A (2500, 3000)	0.1789	0.854	980		D, E	0.21366	0.814	997		D, E	1.094	0.198	998
	Transect B (400, 1000)	1.4683	0.163	907												WD within WD x Tr	t	P(perm)	perms		Transect B (400, 1000)	4.43	0.002	985		WD within WD x Transect	t	P(perm)	perms		WD within WD x Transect	t	P(perm)	perms		Transect B (400, 1000)	3.7626	0.008	983		WD within WD x Transect	t	P(perm)	perms		WD within WD x Transect	t	P(perm)	perms
	Transect B (400, 1900)	0.30206	0.797	977												Transect A (400, 1000)	0.21743	0.819	985		Transect B (400, 1900)	8.0448	0.004	983		Transect A (400, 1000)	2.8711	0.02	985		Transect A (400, 1000)	2.0649	0.07	987		Transect B (400, 1900)	5.639	0.003	984		Transect A (400, 1000)	2.9748	0.021	985		Transect A (400, 1000)	3.0517	0.006	986
	Transect B (400, 2500)	2.3191	0.072	923												Transect A (400, 1900)	4.0832	0.01	972		Transect B (400, 2500)	4.7205	0.006	974		Transect A (400, 1900)	5.4472	0.002	982		Transect A (400, 1900)	4.9303	0.005	973		Transect B (400, 2500)	3.6533	0.012	979		Transect A (400, 1900)	2.1862	0.052	978		Transect A (400, 1900)	3.6072	0.003	986
	Transect B (400, 3000)	5.8807	0.004	977												Transect A (400, 2500)	0.52455	0.599	973		Transect B (400, 3000)	6.6519	0.001	986		Transect A (400, 2500)	5.5407	0.007	976		Transect A (400, 2500)	5.0712	0.003	971		Transect B (400, 3000)	4.238	0.003	982		Transect A (400, 2500)	0.54414	0.621	979		Transect A (400, 2500)	3.9609	0.003	981
	Transect B (1000, 1900)	1.0046	0.35	973												Transect A (400, 3000)	0.28365	0.778	973		Transect B (1000, 1900)	2.2026	0.077	992		Transect A (400, 3000)	5.5372	0.002	963		Transect A (400, 3000)	5.0611	0.003	959		Transect B (1000, 1900)	2.6652	0.046	986		Transect A (400, 3000)	0.48725	0.672	987		Transect A (400, 3000)	3.7914	0.002	986
	Transect B (1000, 2500)	2.7459	0.036	960												Transect A (1000, 1900)	1.498	0.148	982		Transect B (1000, 2500)	1.9107	0.094	986		Transect A (1000, 1900)	8.9585	0.002	989		Transect A (1000, 1900)	7.8864	0.002	985		Transect B (1000, 2500)	0.76362	0.504	988		Transect A (1000, 1900)	4.1926	0.005	988		Transect A (1000, 1900)	2.7564	0.003	987
	Transect B (1000, 3000)	7.3193	0.002	911												Transect A (1000, 2500)	0.407	0.684	980		Transect B (1000, 3000)	2.4842	0.042	957		Transect A (1000, 2500)	9.6438	0.004	993		Transect A (1000, 2500)	8.5102	0.002	977		Transect B (1000, 3000)	0.86257	0.439	954		Transect A (1000, 2500)	2.3636	0.056	986		Transect A (1000, 2500)	3.2067	0.003	990
	Transect B (1900, 2500)	1.6133	0.141	978												Transect A (1000, 3000)	0.0085767	0.992	985		Transect B (1900, 2500)	0.75315	0.478	976		Transect A (1000, 3000)	9.6452	0.001	983		Transect A (1000, 3000)	8.4766	0.003	987		Transect B (1900, 2500)	3.4092	0.012	991		Transect A (1000, 3000)	2.3334	0.038	982		Transect A (1000, 3000)	3.1555	0.003	991
	Transect B (1900, 3000)	2.4444	0.058	973												Transect A (1900, 2500)	3.2169	0.017	978		Transect B (1900, 3000)	0.98336	0.353	986		Transect A (1900, 2500)	1.2588	0.247	987		Transect A (1900, 2500)	1.7768	0.122	977		Transect B (1900, 3000)	2.0744	0.078	982		Transect A (1900, 2500)	1.1607	0.303	980		Transect A (1900, 2500)	1.5479	0.01	979
	Transect B (2500, 3000)	0.35291	0.746	980												Transect A (1900, 3000)	2.0568	0.095	975		Transect B (2500, 3000)	0.0022564	1	983		Transect A (1900, 3000)	1.222	0.274	978		Transect A (1900, 3000)	1.6373	0.127	974		Transect B (2500, 3000)	1.6153	0.161	993		Transect A (1900, 3000)	1.2247	0.244	977		Transect A (1900, 3000)	1.4046	0.012	984
																Transect A (2500, 3000)	0.54147	0.598	985							Transect A (2500, 3000)	0.10119	0.944	983		Transect A (2500, 3000)	0.25261	0.859	984							Transect A (2500, 3000)	0.049718	0.962	983		Transect A (2500, 3000)	1.3313	0.03	985
	Transect C (400, 1000)	0.96386	0.371	936																	Transect C (400, 1000)	0.41766	0.676	977												Transect C (400, 1000)	0.26836	0.774	984
	Transect C (400, 1900)	2.861	0.033	976												Transect B (400, 1000)	5.1123	0.004	990		Transect C (400, 1900)	0.207	0.864	983		Transect B (400, 1000)	1.2175	0.264	982		Transect B (400, 1000)	0.093712	0.917	976		Transect C (400, 1900)	2.939	0.013	982		Transect B (400, 1000)	4.5617	0.004	988		Transect B (400, 1000)	1.938	0.005	994
	Transect C (400, 2500)	3.5762	0.02	965												Transect B (400, 1900)	6.7541	0.004	985		Transect C (400, 2500)	2.037	0.063	977		Transect B (400, 1900)	6.5817	0.002	984		Transect B (400, 1900)	6.3142	0.003	984		Transect C (400, 2500)	1.3971	0.211	977		Transect B (400, 1900)	5.1248	0.003	980		Transect B (400, 1900)	2.8137	0.001	983
	Transect C (400, 3000)	3.4527	0.015	961												Transect B (400, 2500)	5.0325	0.004	982		Transect C (400, 3000)	2.3852	0.045	979		Transect B (400, 2500)	6.3679	0.002	972		Transect B (400, 2500)	6.1851	0.005	980		Transect C (400, 3000)	1.9987	0.102	979		Transect B (400, 2500)	6.8569	0.003	977		Transect B (400, 2500)	2.882	0.003	987
	Transect C (1000, 1900)	2.5222	0.031	935												Transect B (400, 3000)	7.7258	0.001	987		Transect C (1000, 1900)	0.3379	0.751	982		Transect B (400, 3000)	5.8504	0.004	985		Transect B (400, 3000)	5.7231	0.002	987		Transect C (1000, 1900)	1.5488	0.162	982		Transect B (400, 3000)	5.1718	0.006	983		Transect B (400, 3000)	2.7819	0.001	992
	Transect C (1000, 2500)	3.7025	0.012	942												Transect B (1000, 1900)	1.4044	0.193	980		Transect C (1000, 2500)	1.3062	0.251	978		Transect B (1000, 1900)	4.4341	0.011	980		Transect B (1000, 1900)	4.6785	0.006	985		Transect C (1000, 2500)	0.59013	0.576	981		Transect B (1000, 1900)	2.7951	0.039	991		Transect B (1000, 1900)	2.7756	0.004	988
	Transect C (1000, 3000)	3.2641	0.012	941												Transect B (1000, 2500)	1.2136	0.286	988		Transect C (1000, 3000)	1.8679	0.097	978		Transect B (1000, 2500)	4.3367	0.004	983		Transect B (1000, 2500)	4.5912	0.005	982		Transect C (1000, 3000)	0.95388	0.406	973		Transect B (1000, 2500)	4.1351	0.005	982		Transect B (1000, 2500)	2.7116	0.002	987
	Transect C (1900, 2500)	0.41392	0.671	845												Transect B (1000, 3000)	2.1906	0.086	960		Transect C (1900, 2500)	3.5795	0.008	985		Transect B (1000, 3000)	3.9632	0.015	952		Transect B (1000, 3000)	4.2311	0.011	972		Transect C (1900, 2500)	1.9936	0.078	984		Transect B (1000, 3000)	3.0515	0.035	961		Transect B (1000, 3000)	2.8436	0.017	968
	Transect C (1900, 3000)	0.81903	0.439	956												Transect B (1900, 2500)	0.27372	0.816	977		Transect C (1900, 3000)	2.8095	0.026	981		Transect B (1900, 2500)	1.0697	0.323	976		Transect B (1900, 2500)	0.72324	0.491	980		Transect C (1900, 3000)	1.2835	0.227	985		Transect B (1900, 2500)	0.39951	0.686	985		Transect B (1900, 2500)	1.6819	0.003	989
	Transect C (2500, 3000)	0.6083	0.587	963												Transect B (1900, 3000)	0.71764	0.516	988		Transect C (2500, 3000)	1.2161	0.267	982		Transect B (1900, 3000)	0.71259	0.509	986		Transect B (1900, 3000)	1.1969	0.244	978		Transect C (2500, 3000)	0.75745	0.475	985		Transect B (1900, 3000)	0.44915	0.678	983		Transect B (1900, 3000)	1.7501	0.005	988
																Transect B (2500, 3000)	0.21873	0.861	991							Transect B (2500, 3000)	1.2861	0.231	988		Transect B (2500, 3000)	1.5209	0.175	986							Transect B (2500, 3000)	0.14676	0.906	982		Transect B (2500, 3000)	1.7278	0.011	988
	Transect D (400, 1000)	1.378	0.215	554																	Transect D (400, 1000)	0.62942	0.544	978												Transect D (400, 1000)	0.57254	0.575	980
	Transect D (400, 1900)	2.1104	0.06	977												Transect C (400, 1000)	0.332	0.747	981		Transect D (400, 1900)	0.32349	0.739	976		Transect C (400, 1000)	1.0174	0.333	979		Transect C (400, 1000)	1.3608	0.203	984		Transect D (400, 1900)	0.43895	0.691	970		Transect C (400, 1000)	1.4981	0.178	983		Transect C (400, 1000)	1.8643	0.007	979
	Transect D (400, 2500)	5.2812	0.004	887												Transect C (400, 1900)	0.37602	0.718	982		Transect D (400, 2500)	2.7682	0.022	981		Transect C (400, 1900)	4.7577	0.004	969		Transect C (400, 1900)	4.9298	0.001	984		Transect D (400, 2500)	1.026	0.362	981		Transect C (400, 1900)	2.44	0.046	981		Transect C (400, 1900)	3.0807	0.007	982
	Transect D (400, 3000)	2.5683	0.034	965												Transect C (400, 2500)	1.9456	0.099	978		Transect D (400, 3000)	2.2618	0.06	976		Transect C (400, 2500)	4.5393	0.005	972		Transect C (400, 2500)	4.8059	0.006	980		Transect D (400, 3000)	1.3637	0.23	991		Transect C (400, 2500)	5.2558	0.004	988		Transect C (400, 2500)	2.5378	0.002	978
	Transect D (1000, 1900)	1.0104	0.365	905												Transect C (400, 3000)	1.8783	0.109	971		Transect D (1000, 1900)	0.3483	0.717	982		Transect C (400, 3000)	4.9365	0.002	978		Transect C (400, 3000)	5.1372	0.004	982		Transect D (1000, 1900)	0.02638	0.966	980		Transect C (400, 3000)	4.393	0.003	975		Transect C (400, 3000)	3.1446	0.004	986
	Transect D (1000, 2500)	4.2475	0.01	833												Transect C (1000, 1900)	0.095228	0.93	983		Transect D (1000, 2500)	1.677	0.124	975		Transect C (1000, 1900)	8.4253	0.002	979		Transect C (1000, 1900)	8.2274	0.002	979		Transect D (1000, 2500)	0.90755	0.407	979		Transect C (1000, 1900)	0.716	0.498	979		Transect C (1000, 1900)	3.1007	0.001	982
	Transect D (1000, 3000)	1.3522	0.205	827												Transect C (1000, 2500)	1.1439	0.336	974		Transect D (1000, 3000)	1.1681	0.293	985		Transect C (1000, 2500)	8.1175	0.005	987		Transect C (1000, 2500)	8.113	0.003	985		Transect D (1000, 3000)	1.654	0.151	975		Transect C (1000, 2500)	3.059	0.034	982		Transect C (1000, 2500)	2.6808	0.001	980
	Transect D (1900, 2500)	2.2136	0.054	920												Transect C (1000, 3000)	1.3029	0.214	976		Transect D (1900, 2500)	2.4354	0.041	968		Transect C (1000, 3000)	8.6965	0.004	974		Transect C (1000, 3000)	8.5108	0.004	971		Transect D (1900, 2500)	0.61272	0.601	978		Transect C (1000, 3000)	2.5527	0.058	973		Transect C (1000, 3000)	3.2382	0.004	984
	Transect D (1900, 3000)	0.14064	0.871	952												Transect C (1900, 2500)	2.9187	0.023	981		Transect D (1900, 3000)	1.8986	0.102	992		Transect C (1900, 2500)	1.6472	0.139	981		Transect C (1900, 2500)	1.1404	0.253	981		Transect D (1900, 3000)	0.98207	0.344	969		Transect C (1900, 2500)	2.6772	0.035	976		Transect C (1900, 2500)	1.47	0.003	982
	Transect D (2500, 3000)	2.5019	0.041	962												Transect C (1900, 3000)	2.0494	0.088	979		Transect D (2500, 3000)	0.8954	0.386	974		Transect C (1900, 3000)	1.4643	0.193	985		Transect C (1900, 3000)	1.2656	0.218	978		Transect D (2500, 3000)	0.39958	0.719	982		Transect C (1900, 3000)	2.0921	0.079	984		Transect C (1900, 3000)	1.6417	0.001	988
																Transect C (2500, 3000)	0.5647	0.604	980							Transect C (2500, 3000)	3.3235	0.005	989		Transect C (2500, 3000)	3.4412	0.011	986							Transect C (2500, 3000)	0.19138	0.858	979		Transect C (2500, 3000)	1.3747	0.024	981
	Transect E (400, 1000)	4.028	0.002	886																	Transect E (400, 1000)	1.8072	0.131	983												Transect E (400, 1000)	0.58839	0.585	982
	Transect E (400, 1900)	3.1659	0.01	925												Transect D (400, 1000)	0.34478	0.753	983		Transect E (400, 1900)	0.19118	0.843	987		Transect D (400, 1000)	0.31312	0.757	977		Transect D (400, 1000)	0.33086	0.755	980		Transect E (400, 1900)	1.649	0.124	978		Transect D (400, 1000)	1.4343	0.195	977		Transect D (400, 1000)	1.3778	0.035	988
	Transect E (400, 2500)	0.29243	0.834	970												Transect D (400, 1900)	0.78072	0.445	981		Transect E (400, 2500)	0.18865	0.852	972		Transect D (400, 1900)	4.4763	0.008	969		Transect D (400, 1900)	5.0512	0.006	981		Transect E (400, 2500)	2.3358	0.052	973		Transect D (400, 1900)	2.9564	0.023	987		Transect D (400, 1900)	3.0335	0.003	982
	Transect E (400, 3000)	1.3143	0.235	977												Transect D (400, 2500)	1.3378	0.197	976		Transect E (400, 3000)	0.21024	0.816	979		Transect D (400, 2500)	4.2646	0.006	988		Transect D (400, 2500)	4.9379	0.004	984		Transect E (400, 3000)	0.60629	0.568	983		Transect D (400, 2500)	2.3956	0.036	980		Transect D (400, 2500)	2.7259	0.005	986
	Transect E (1000, 1900)	1.5912	0.163	837												Transect D (400, 3000)	0.62508	0.539	982		Transect E (1000, 1900)	1.762	0.144	983		Transect D (400, 3000)	4.5363	0.005	972		Transect D (400, 3000)	5.1716	0.002	978		Transect E (1000, 1900)	1.1091	0.31	976		Transect D (400, 3000)	2.2199	0.058	987		Transect D (400, 3000)	2.9592	0.005	989
	Transect E (1000, 2500)	2.3673	0.05	920												Transect D (1000, 1900)	0.57757	0.562	979		Transect E (1000, 2500)	2.0577	0.091	976		Transect D (1000, 1900)	2.3397	0.034	971		Transect D (1000, 1900)	2.3661	0.028	969		Transect E (1000, 2500)	2.9091	0.021	979		Transect D (1000, 1900)	5.1168	0.003	985		Transect D (1000, 1900)	2.4835	0.006	986
	Transect E (1000, 3000)	1.8102	0.122	913												Transect D (1000, 2500)	2.5159	0.039	981		Transect E (1000, 3000)	2.4475	0.03	980		Transect D (1000, 2500)	2.2857	0.035	977		Transect D (1000, 2500)	2.366	0.038	987		Transect E (1000, 3000)	0.012853	0.998	982		Transect D (1000, 2500)	4.5183	0.006	980		Transect D (1000, 2500)	2.337	0.004	981
	Transect E (1900, 2500)	1.4857	0.188	970												Transect D (1000, 3000)	1.3277	0.228	980		Transect E (1900, 2500)	0.40106	0.688	989		Transect D (1000, 3000)	2.3801	0.034	975		Transect D (1000, 3000)	2.4327	0.028	978		Transect E (1900, 2500)	3.8057	0.016	982		Transect D (1000, 3000)	4.7294	0.004	985		Transect D (1000, 3000)	2.3714	0.004	981
	Transect E (1900, 3000)	0.74628	0.457	940												Transect D (1900, 2500)	2.9787	0.019	983		Transect E (1900, 3000)	0.47285	0.64	981		Transect D (1900, 2500)	0.097238	0.943	977		Transect D (1900, 2500)	0.15292	0.902	981		Transect E (1900, 3000)	1.1807	0.285	976		Transect D (1900, 2500)	0.62992	0.555	979		Transect D (1900, 2500)	1.5148	0.007	983
	Transect E (2500, 3000)	0.70667	0.484	930												Transect D (1900, 3000)	1.8421	0.117	983		Transect E (2500, 3000)	0.010729	0.993	989		Transect D (1900, 3000)	0.72909	0.468	983		Transect D (1900, 3000)	1.5218	0.179	987		Transect E (2500, 3000)	3.0099	0.031	982		Transect D (1900, 3000)	1.0819	0.301	988		Transect D (1900, 3000)	1.246	0.059	982
																Transect D (2500, 3000)	1.0534	0.289	979							Transect D (2500, 3000)	0.3203	0.838	980		Transect D (2500, 3000)	0.31629	0.845	978							Transect D (2500, 3000)	0.40717	0.681	974		Transect D (2500, 3000)	1.396	0.023	989
	Transect within WD x Transect	t	P(perm)	perms																	Transect within WD x Transect	t	P(perm)	perms												Transect within WD x Transect	t	P(perm)	perms
	400m (A, B)	2.6491	0.027	757												Transect E (400, 1000)	1.0922	0.353	989		400m (A, B)	9.9559	0.001	974		Transect E (400, 1000)	2.1296	0.074	979		Transect E (400, 1000)	1.1972	0.277	984		400m (A, B)	1.9742	0.104	991		Transect E (400, 1000)	0.64885	0.557	979		Transect E (400, 1000)	1.6409	0.003	985
	400m (A, C)	0.92549	0.384	899												Transect E (400, 1900)	1.3713	0.186	980		400m (A, C)	1.7492	0.117	978		Transect E (400, 1900)	6.0896	0.004	977		Transect E (400, 1900)	3.8193	0.009	986		400m (A, C)	0.084652	0.868	966		Transect E (400, 1900)	0.1597	0.892	983		Transect E (400, 1900)	2.599	0.003	986
	400m (A, D)	1.2556	0.276	973												Transect E (400, 2500)	0.37257	0.71	984		400m (A, D)	2.8348	0.031	968		Transect E (400, 2500)	6.7282	0.006	987		Transect E (400, 2500)	4.3157	0.007	984		400m (A, D)	0.14367	0.872	977		Transect E (400, 2500)	1.6836	0.121	969		Transect E (400, 2500)	3.0542	0.002	981
	400m (A, E)	4.7352	0.006	957												Transect E (400, 3000)	3.3516	0.002	983		400m (A, E)	0.015811	0.981	975		Transect E (400, 3000)	6.5025	0.003	984		Transect E (400, 3000)	4.058	0.007	985		400m (A, E)	2.0879	0.081	987		Transect E (400, 3000)	1.5003	0.154	967		Transect E (400, 3000)	2.6804	0.002	987
	400m (B, C)	1.8144	0.113	937												Transect E (1000, 1900)	2.164	0.069	973		400m (B, C)	2.1806	0.047	971		Transect E (1000, 1900)	5.2457	0.002	979		Transect E (1000, 1900)	3.7575	0.005	980		400m (B, C)	1.8759	0.11	978		Transect E (1000, 1900)	2.2764	0.059	981		Transect E (1000, 1900)	2.3812	0.006	975
	400m (B, D)	2.4765	0.043	980												Transect E (1000, 2500)	1.2083	0.245	979		400m (B, D)	2.454	0.034	977		Transect E (1000, 2500)	6.2253	0.004	989		Transect E (1000, 2500)	4.5458	0.006	976		400m (B, D)	1.6225	0.148	982		Transect E (1000, 2500)	8.7042	0.001	981		Transect E (1000, 2500)	3.1253	0.003	988
	400m (B, E)	2.6681	0.029	956												Transect E (1000, 3000)	3.6453	0.012	975		400m (B, E)	5.6395	0.005	984		Transect E (1000, 3000)	5.8744	0.005	979		Transect E (1000, 3000)	4.1291	0.009	976		400m (B, E)	3.8851	0.009	980		Transect E (1000, 3000)	2.6322	0.039	973		Transect E (1000, 3000)	2.5587	0.004	986
	400m (C, D)	0.038984	0.978	977												Transect E (1900, 2500)	0.66097	0.535	985		400m (C, D)	0.32025	0.768	967		Transect E (1900, 2500)	3.0444	0.019	981		Transect E (1900, 2500)	3.4545	0.008	976		400m (C, D)	0.072091	0.927	978		Transect E (1900, 2500)	6.4826	0.003	985		Transect E (1900, 2500)	1.9089	0.002	985
	400m (C, E)	3.0413	0.024	969												Transect E (1900, 3000)	1.5184	0.16	989		400m (C, E)	1.514	0.157	982		Transect E (1900, 3000)	1.7844	0.109	986		Transect E (1900, 3000)	1.4726	0.175	984		400m (C, E)	1.6718	0.154	980		Transect E (1900, 3000)	2.1696	0.057	980		Transect E (1900, 3000)	1.4204	0.015	987
	400m (D, E)	3.9951	0.004	958												Transect E (2500, 3000)	1.8051	0.091	981		400m (D, E)	2.2529	0.066	979		Transect E (2500, 3000)	1.3374	0.212	974		Transect E (2500, 3000)	1.7293	0.122	980		400m (D, E)	1.1696	0.302	986		Transect E (2500, 3000)	0.43094	0.65	969		Transect E (2500, 3000)	1.2206	0.107	985
	1000m (A, B)	0.92355	0.441	927												Transect within WD x Transect	t	P(perm)	perms		1000m (A, B)	0.42172	0.682	958		Transect within WD x Transect	t	P(perm)	perms		Transect within WD x Transect	t	P(perm)	perms		1000m (A, B)	0.86705	0.454	961		Transect within WD x Transect	t	P(perm)	perms		Transect within WD x Transect	t	P(perm)	perms
	1000m (A, C)	0.85259	0.451	975												400m (A, B)	7.2752	0.005	986		1000m (A, C)	0.1279	0.901	985		400m (A, B)	3.5339	0.008	972		400m (A, B)	2.143	0.062	980		1000m (A, C)	0.20575	0.829	983		400m (A, B)	7.7478	0.003	982		400m (A, B)	3.0003	0.004	989
	1000m (A, D)	0.97122	0.394	908												400m (A, C)	1.4676	0.195	989		1000m (A, D)	0.31755	0.765	989		400m (A, C)	3.9371	0.006	980		400m (A, C)	3.2746	0.014	986		1000m (A, D)	0.044767	0.972	986		400m (A, C)	4.4314	0.006	983		400m (A, C)	2.7221	0.004	988
	1000m (A, E)	0.14876	0.878	758												400m (A, D)	1.0221	0.311	982		1000m (A, E)	0.44472	0.681	983		400m (A, D)	3.0767	0.009	986		400m (A, D)	2.0834	0.068	974		1000m (A, E)	1.1308	0.309	983		400m (A, D)	2.7351	0.028	986		400m (A, D)	2.6929	0.003	988
	1000m (B, C)	0.156	0.874	962												400m (A, E)	0.68238	0.511	975		1000m (B, C)	0.34327	0.736	984		400m (A, E)	3.2547	0.013	979		400m (A, E)	3.0845	0.013	982		1000m (B, C)	0.74216	0.521	988		400m (A, E)	1.5149	0.153	985		400m (A, E)	2.6108	0.001	969
	1000m (B, D)	0.033453	0.977	856												400m (B, C)	2.6751	0.026	987		1000m (B, D)	0.14473	0.881	984		400m (B, C)	1.1338	0.314	977		400m (B, C)	2.1619	0.071	967		1000m (B, D)	1.8638	0.113	984		400m (B, C)	0.47851	0.642	984		400m (B, C)	1.5587	0.009	985
	1000m (B, E)	1.411	0.231	906												400m (B, D)	2.7808	0.03	984		1000m (B, E)	0.016702	0.992	978		400m (B, D)	0.53654	0.621	981		400m (B, D)	0.030984	0.965	984		1000m (B, E)	0.33072	0.76	990		400m (B, D)	3.3034	0.016	983		400m (B, D)	1.3891	0.02	986
	1000m (C, D)	0.16823	0.805	846												400m (B, E)	6.8934	0.004	973		1000m (C, D)	0.2131	0.856	985		400m (B, E)	0.61419	0.571	983		400m (B, E)	1.759	0.126	986		1000m (C, D)	0.22753	0.831	980		400m (B, E)	2.5078	0.031	975		400m (B, E)	1.4497	0.017	981
	1000m (C, E)	1.1068	0.298	883												400m (C, D)	0.25982	0.767	978		1000m (C, E)	0.35337	0.737	989		400m (C, D)	1.3534	0.205	984		400m (C, D)	1.8383	0.113	973		1000m (C, E)	0.95034	0.373	976		400m (C, D)	1.9554	0.095	986		400m (C, D)	1.3746	0.049	981
	1000m (D, E)	1.3132	0.195	435												400m (C, E)	1.1066	0.283	985		1000m (D, E)	0.13616	0.885	984		400m (C, E)	1.6386	0.132	984		400m (C, E)	0.23566	0.818	977		1000m (D, E)	2.1563	0.068	988		400m (C, E)	1.7871	0.12	978		400m (C, E)	1.4671	0.011	984
																400m (D, E)	0.68507	0.524	980							400m (D, E)	0.056737	0.967	981		400m (D, E)	1.5254	0.17	987							400m (D, E)	0.29624	0.789	990		400m (D, E)	1.1321	0.232	986
	1900m (A, B)	1.0276	0.299	965																	1900m (A, B)	2.9712	0.017	978												1900m (A, B)	0.60028	0.564	985
	1900m (A, C)	0.27217	0.767	937												1000m (A, B)	0.37505	0.67	960		1900m (A, C)	5.2616	0.005	977		1000m (A, B)	0.64394	0.522	948		1000m (A, B)	0.24444	0.829	957		1900m (A, C)	0.13649	0.912	977		1000m (A, B)	0.76461	0.49	962		1000m (A, B)	1.193	0.144	956
	1900m (A, D)	0.85203	0.429	957												1000m (A, C)	0.2984	0.764	979		1900m (A, D)	4.2584	0.006	983		1000m (A, C)	1.2716	0.229	988		1000m (A, C)	1.0721	0.326	983		1900m (A, D)	2.2088	0.073	984		1000m (A, C)	0.29394	0.774	985		1000m (A, C)	1.2784	0.073	989
	1900m (A, E)	2.1027	0.065	961												1000m (A, D)	0.67277	0.489	989		1900m (A, E)	2.4861	0.043	976		1000m (A, D)	0.37322	0.751	990		1000m (A, D)	0.23621	0.847	989		1900m (A, E)	0.88672	0.432	979		1000m (A, D)	2.0339	0.084	989		1000m (A, D)	1.2308	0.099	985
	1900m (B, C)	1.3566	0.199	920												1000m (A, E)	0.4396	0.668	986		1900m (B, C)	2.4059	0.058	974		1000m (A, E)	2.6792	0.034	986		1000m (A, E)	3.4477	0.016	984		1900m (B, C)	0.51391	0.608	978		1000m (A, E)	0.99977	0.402	987		1000m (A, E)	1.4462	0.017	983
	1900m (B, D)	0.13131	0.901	974												1000m (B, C)	0.056796	0.957	986		1900m (B, D)	2.0976	0.077	985		1000m (B, C)	1.4042	0.237	987		1000m (B, C)	0.99493	0.38	990		1900m (B, D)	2.3291	0.059	977		1000m (B, C)	0.074374	0.938	986		1000m (B, C)	1.2854	0.056	988
	1900m (B, E)	0.9015	0.408	886												1000m (B, D)	0.57168	0.577	981		1900m (B, E)	0.028877	0.974	986		1000m (B, D)	0.76209	0.454	981		1000m (B, D)	0.36656	0.708	981		1900m (B, E)	1.1543	0.278	985		1000m (B, D)	1.8745	0.106	988		1000m (B, D)	1.3121	0.084	982
	1900m (C, D)	1.1547	0.263	960												1000m (B, E)	0.069337	0.946	988		1900m (C, D)	0.36259	0.751	977		1000m (B, E)	2.1476	0.068	986		1000m (B, E)	2.5635	0.038	986		1900m (C, D)	1.9105	0.102	979		1000m (B, E)	0.25293	0.802	993		1000m (B, E)	1.3096	0.062	980
	1900m (C, E)	2.5981	0.037	969												1000m (C, D)	0.41313	0.676	985		1900m (C, E)	2.0213	0.079	977		1000m (C, D)	0.11544	0.93	985		1000m (C, D)	0.19967	0.862	976		1900m (C, E)	0.49055	0.64	983		1000m (C, D)	0.85452	0.427	990		1000m (C, D)	1.0088	0.49	985
	1900m (D, E)	0.99451	0.365	953												1000m (C, E)	0.10054	0.922	978		1900m (D, E)	1.9072	0.101	982		1000m (C, E)	1.5671	0.155	979		1000m (C, E)	2.7772	0.022	976		1900m (D, E)	1.6824	0.124	971		1000m (C, E)	0.14829	0.898	984		1000m (C, E)	1.2939	0.039	985
																1000m (D, E)	0.49844	0.633	984							1000m (D, E)	0.70699	0.585	987		1000m (D, E)	1.2265	0.289	979							1000m (D, E)	1.9669	0.087	983		1000m (D, E)	1.1444	0.172	981
	2500m (A, B)	0.36351	0.741	972																	2500m (A, B)	0.37622	0.737	979												2500m (A, B)	1.8563	0.096	981
	2500m (A, C)	0.40614	0.694	919												1900m (A, B)	4.2297	0.01	980		2500m (A, C)	0.21974	0.816	985		1900m (A, B)	0.68018	0.493	979		1900m (A, B)	0.43403	0.686	980		2500m (A, C)	1.5146	0.177	974		1900m (A, B)	0.99717	0.339	984		1900m (A, B)	1.2928	0.06	987
	2500m (A, D)	0.85321	0.448	949												1900m (A, C)	6.2568	0.005	979		2500m (A, D)	0.0075138	0.989	973		1900m (A, C)	0.62337	0.573	987		1900m (A, C)	0.82647	0.447	977		2500m (A, D)	1.1438	0.28	977		1900m (A, C)	3.2459	0.014	988		1900m (A, C)	1.4755	0.009	986
	2500m (A, E)	0.3184	0.741	970												1900m (A, D)	5.2912	0.005	987		2500m (A, E)	0.025114	0.981	982		1900m (A, D)	0.95771	0.326	973		1900m (A, D)	0.5655	0.577	988		2500m (A, E)	3.3927	0.015	991		1900m (A, D)	1.2665	0.228	979		1900m (A, D)	1.4245	0.01	988
	2500m (B, C)	0.053074	0.964	955												1900m (A, E)	3.3884	0.013	984		2500m (B, C)	0.26785	0.82	981		1900m (A, E)	1.8288	0.091	965		1900m (A, E)	1.3498	0.216	987		2500m (B, C)	0.13827	0.895	977		1900m (A, E)	5.2068	0.001	983		1900m (A, E)	1.5042	0.015	980
	2500m (B, D)	0.41931	0.652	926												1900m (B, C)	1.5667	0.167	977		2500m (B, D)	0.36366	0.75	975		1900m (B, C)	2.0263	0.067	975		1900m (B, C)	1.9521	0.098	980		2500m (B, D)	0.27045	0.795	985		1900m (B, C)	1.7614	0.121	978		1900m (B, C)	1.1005	0.255	989
	2500m (B, E)	0.65037	0.569	947												1900m (B, D)	2.2778	0.047	977		2500m (B, E)	0.36286	0.71	979		1900m (B, D)	0.34757	0.749	981		1900m (B, D)	0.21408	0.849	979		2500m (B, E)	1.9916	0.087	978		1900m (B, D)	0.035805	0.977	971		1900m (B, D)	0.99979	0.5	987
	2500m (C, D)	0.76337	0.471	625												1900m (B, E)	0.91508	0.379	983		2500m (C, D)	0.19689	0.872	984		1900m (B, E)	1.5789	0.155	975		1900m (B, E)	1.4156	0.191	990		2500m (C, D)	0.14402	0.875	983		1900m (B, E)	2.6627	0.027	985		1900m (B, E)	1.2036	0.12	982
	2500m (C, E)	0.73089	0.541	957												1900m (C, D)	1.198	0.258	981		2500m (C, E)	0.19923	0.851	984		1900m (C, D)	2.9762	0.026	982		1900m (C, D)	2.2646	0.055	974		2500m (C, E)	1.8804	0.108	968		1900m (C, D)	2.0976	0.056	980		1900m (C, D)	1.1675	0.129	986
	2500m (D, E)	1.1086	0.31	959												1900m (C, E)	2.5822	0.041	990		2500m (D, E)	0.030447	0.968	974		1900m (C, E)	3.2109	0.021	982		1900m (C, E)	2.9404	0.02	987		2500m (D, E)	1.7451	0.126	985		1900m (C, E)	0.60242	0.533	975		1900m (C, E)	1.5534	0.005	982
																1900m (D, E)	2.9756	0.016	980							1900m (D, E)	1.4977	0.155	980		1900m (D, E)	1.3223	0.231	974							1900m (D, E)	3.6971	0.003	983		1900m (D, E)	1.1886	0.105	982
	3000m (A, B)	0.032799	0.968	975																	3000m (A, B)	0.65566	0.528	983												3000m (A, B)	0.91163	0.42	984
	3000m (A, C)	0.1285	0.916	949												2500m (A, B)	0.29078	0.751	980		3000m (A, C)	1.3302	0.23	981		2500m (A, B)	3.9873	0.012	987		2500m (A, B)	3.639	0.014	974		3000m (A, C)	1.0555	0.326	978		2500m (A, B)	0.51926	0.639	976		2500m (A, B)	1.6749	0.012	982
	3000m (A, D)	1.2501	0.283	965												2500m (A, C)	0.18419	0.843	979		3000m (A, D)	0.082798	0.953	985		2500m (A, C)	2.6913	0.046	986		2500m (A, C)	3.4739	0.008	980		3000m (A, D)	1.0835	0.291	983		2500m (A, C)	0.33809	0.775	985		2500m (A, C)	1.2689	0.07	985
	3000m (A, E)	1.3697	0.18	947												2500m (A, D)	0.0086947	0.983	974		3000m (A, E)	0.40196	0.674	983		2500m (A, D)	1.1679	0.304	983		2500m (A, D)	1.1455	0.327	986		3000m (A, E)	1.3187	0.225	988		2500m (A, D)	0.47994	0.634	979		2500m (A, D)	1.1095	0.251	977
	3000m (B, C)	0.15868	0.866	981												2500m (A, E)	0.56389	0.622	983		3000m (B, C)	0.80741	0.453	986		2500m (A, E)	1.4819	0.189	981		2500m (A, E)	1.2008	0.275	978		3000m (B, C)	0.30689	0.763	987		2500m (A, E)	0.47366	0.634	980		2500m (A, E)	1.2386	0.06	991
	3000m (B, D)	2.4639	0.049	976												2500m (B, C)	0.4395	0.672	977		3000m (B, D)	1.235	0.247	984		2500m (B, C)	1.7401	0.121	976		2500m (B, C)	1.7474	0.105	980		3000m (B, D)	0.3772	0.715	989		2500m (B, C)	0.29297	0.767	986		2500m (B, C)	1.2097	0.104	987
	3000m (B, E)	2.1491	0.078	973												2500m (B, D)	0.31238	0.755	982		3000m (B, E)	0.53284	0.601	985		2500m (B, D)	0.19389	0.887	983		2500m (B, D)	0.38634	0.745	986		3000m (B, E)	0.49013	0.636	988		2500m (B, D)	1.1317	0.285	973		2500m (B, D)	1.3139	0.079	988
	3000m (C, D)	1.9749	0.074	967												2500m (B, E)	0.18534	0.854	984		3000m (C, D)	1.7875	0.129	981		2500m (B, E)	2.932	0.029	978		2500m (B, E)	2.6528	0.04	978		3000m (C, D)	0.088499	0.932	967		2500m (B, E)	1.293	0.251	974		2500m (B, E)	1.565	0.033	985
	3000m (C, E)	1.9812	0.081	954												2500m (C, D)	0.2005	0.839	986		3000m (C, E)	1.3195	0.225	984		2500m (C, D)	0.39033	0.775	981		2500m (C, D)	0.28545	0.851	976		3000m (C, E)	0.068045	0.93	984		2500m (C, D)	1.0699	0.311	979		2500m (C, D)	0.84333	0.758	980
	3000m (D, E)	0.31494	0.755	978												2500m (C, E)	0.76726	0.512	987		3000m (D, E)	0.93436	0.395	985		2500m (C, E)	1.369	0.219	979		2500m (C, E)	1.7695	0.124	979		3000m (D, E)	0.037376	0.968	986		2500m (C, E)	1.4039	0.198	987		2500m (C, E)	1.0281	0.429	982
																2500m (D, E)	0.61068	0.593	988							2500m (D, E)	0.76288	0.567	978		2500m (D, E)	0.75832	0.6	982							2500m (D, E)	0.12685	0.902	979		2500m (D, E)	0.99528	0.48	981
																3000m (A, B)	0.45616	0.665	988							3000m (A, B)	0.71061	0.549	987		3000m (A, B)	0.76205	0.52	988							3000m (A, B)	0.59146	0.577	982		3000m (A, B)	0.95213	0.575	985
																3000m (A, C)	0.90044	0.424	978							3000m (A, C)	0.30462	0.774	972		3000m (A, C)	0.081226	0.946	983							3000m (A, C)	0.19962	0.849	981		3000m (A, C)	1.236	0.115	979
																3000m (A, D)	0.037835	0.967	974							3000m (A, D)	2.4779	0.03	980		3000m (A, D)	2.3488	0.048	978							3000m (A, D)	0.7895	0.459	985		3000m (A, D)	1.6716	0.004	992
																3000m (A, E)	1.2133	0.287	979							3000m (A, E)	2.4606	0.036	986		3000m (A, E)	2.5444	0.045	983							3000m (A, E)	0.10496	0.913	980		3000m (A, E)	1.4093	0.016	991
																3000m (B, C)	0.64233	0.531	985							3000m (B, C)	0.84145	0.483	987		3000m (B, C)	0.81369	0.485	985							3000m (B, C)	0.46134	0.628	985		3000m (B, C)	0.95348	0.565	987
																3000m (B, D)	0.88958	0.394	990							3000m (B, D)	0.52221	0.612	991		3000m (B, D)	0.51502	0.591	989							3000m (B, D)	1.345	0.195	978		3000m (B, D)	1.5162	0.016	985
																3000m (B, E)	1.883	0.11	990							3000m (B, E)	0.53092	0.641	993		3000m (B, E)	0.88884	0.39	985							3000m (B, E)	0.40922	0.69	991		3000m (B, E)	1.2316	0.109	988
																3000m (C, D)	1.254	0.239	982							3000m (C, D)	2.8946	0.014	988		3000m (C, D)	2.5135	0.034	973							3000m (C, D)	1.1216	0.288	989		3000m (C, D)	1.6398	0.004	978
																3000m (C, E)	0.0838	0.947	979							3000m (C, E)	2.8652	0.032	981		3000m (C, E)	2.6624	0.051	977							3000m (C, E)	0.052354	0.958	978		3000m (C, E)	1.4531	0.032	992
																3000m (D, E)	2.3732	0.057	977							3000m (D, E)	0.020056	0.99	986		3000m (D, E)	0.6666	0.534	976							3000m (D, E)	0.73066	0.474	981		3000m (D, E)	0.91742	0.669	976
																										WD within WD x Season	t	P(perm)	perms		WD within WD x Season	t	P(perm)	perms												WD within WD x Season	t	P(perm)	perms
																										Dry season (400, 1000)	0.30992	0.759	998		Dry season (400, 1000)	0.24574	0.815	997												Dry season (400, 1000)	2.2513	0.001	996
																										Dry season (400, 1900)	6.0174	0.001	998		Dry season (400, 1900)	6.9677	0.001	998												Dry season (400, 1900)	4.5723	0.001	998
																										Dry season (400, 2500)	5.8887	0.001	997		Dry season (400, 2500)	6.8816	0.001	998												Dry season (400, 2500)	4.1908	0.001	999
																										Dry season (400, 3000)	6.0736	0.001	998		Dry season (400, 3000)	7.0545	0.001	998												Dry season (400, 3000)	4.2987	0.001	999
																										Dry season (1000, 1900)	6.853	0.001	999		Dry season (1000, 1900)	6.6	0.001	995												Dry season (1000, 1900)	4.5167	0.001	998
																										Dry season (1000, 2500)	6.6665	0.001	999		Dry season (1000, 2500)	6.5118	0.001	998												Dry season (1000, 2500)	4.1845	0.001	998
																										Dry season (1000, 3000)	6.913	0.001	999		Dry season (1000, 3000)	6.6861	0.001	998												Dry season (1000, 3000)	4.337	0.001	999
																										Dry season (1900, 2500)	0.60861	0.592	998		Dry season (1900, 2500)	0.24047	0.839	997												Dry season (1900, 2500)	1.9636	0.001	998
																										Dry season (1900, 3000)	0.78908	0.441	993		Dry season (1900, 3000)	1.1271	0.283	998												Dry season (1900, 3000)	2.0291	0.001	999
																										Dry season (2500, 3000)	1.0043	0.336	997		Dry season (2500, 3000)	0.87632	0.422	999												Dry season (2500, 3000)	1.431	0.008	999
																										Wet season (400, 1000)	3.6182	0.002	996		Wet season (400, 1000)	2.3744	0.036	995												Wet season (400, 1000)	2.3706	0.001	998
																										Wet season (400, 1900)	10.959	0.001	997		Wet season (400, 1900)	7.6952	0.001	994												Wet season (400, 1900)	4.1697	0.001	998
																										Wet season (400, 2500)	11.449	0.001	998		Wet season (400, 2500)	8.1155	0.001	997												Wet season (400, 2500)	4.4965	0.001	999
																										Wet season (400, 3000)	10.972	0.001	998		Wet season (400, 3000)	7.7697	0.001	999												Wet season (400, 3000)	4.5501	0.001	997
																										Wet season (1000, 1900)	6.2776	0.001	998		Wet season (1000, 1900)	5.8379	0.001	997												Wet season (1000, 1900)	3.4872	0.001	998
																										Wet season (1000, 2500)	6.7675	0.001	995		Wet season (1000, 2500)	6.3763	0.001	997												Wet season (1000, 2500)	4.0613	0.001	998
																										Wet season (1000, 3000)	6.5238	0.001	997		Wet season (1000, 3000)	6.1276	0.001	992												Wet season (1000, 3000)	4.209	0.001	998
																										Wet season (1900, 2500)	2.299	0.039	997		Wet season (1900, 2500)	2.9319	0.008	998												Wet season (1900, 2500)	2.0375	0.001	999
																										Wet season (1900, 3000)	2.6389	0.014	998		Wet season (1900, 3000)	3.1725	0.006	994												Wet season (1900, 3000)	2.1665	0.001	999
																										Wet season (2500, 3000)	0.71283	0.513	999		Wet season (2500, 3000)	0.59781	0.569	993												Wet season (2500, 3000)	1.5893	0.001	998
																										Season within WD x Season	t	P(perm)	perms		Season within WD x Season	t	P(perm)	perms												Season within WD x Season	t	P(perm)	perms
																										400 m (wet, dry)	0.26611	0.811	998		400 m (wet, dry)	1.1219	0.292	996												400 m (wet, dry)	1.1861	0.092	998
																										1000 m (wet, dry)	2.4921	0.02	997		1000 m (wet, dry)	2.6823	0.009	997												1000 m (wet, dry)	1.4458	0.019	999
																										1900 m (wet, dry)	0.93511	0.366	997		1900 m (wet, dry)	0.97619	0.337	998												1900 m (wet, dry)	1.2976	0.025	999
																										2500 m (wet, dry)	1.4923	0.135	997		2500 m (wet, dry)	1.5405	0.122	998												2500 m (wet, dry)	1.4549	0.011	999
																										3000 m (wet, dry)	1.0469	0.312	996		3000 m (wet, dry)	1.2862	0.242	994												3000 m (wet, dry)	1.6192	0.003	998
																																														Transect within Transect x Season	t	P(perm)	perms
																																														Dry season (A, B)	1.5187	0.003	997
																																														Dry season (A, C)	1.6171	0.001	999
																																														Dry season (A, D)	1.6723	0.001	999
																																														Dry season (A, E)	1.9104	0.001	998
																																														Dry season (B, C)	1.407	0.009	998
																																														Dry season (B, D)	1.2931	0.041	996
																																														Dry season (B, E)	1.4733	0.006	998
																																														Dry season (C, D)	1.0787	0.253	998
																																														Dry season (C, E)	1.2276	0.045	998
																																														Dry season (D, E)	1.1181	0.199	997
																																														Wet season (A, B)	1.4534	0.006	998
																																														Wet season (A, C)	1.2574	0.037	999
																																														Wet season (A, D)	1.5211	0.003	999
																																														Wet season (A, E)	1.4518	0.005	999
																																														Wet season (B, C)	0.9615	0.555	997
																																														Wet season (B, D)	1.3573	0.017	998
																																														Wet season (B, E)	1.4954	0.002	998
																																														Wet season (C, D)	1.2587	0.067	998
																																														Wet season (C, E)	1.4636	0.001	998
																																														Wet season (D, E)	1.1267	0.156	997
																																														Season within Transect x Season	t	P(perm)	perms
																																														Transect A (wet, dry)	1.031	0.404	999
																																														Transect B (wet, dry)	1.7201	0.002	999
																																														Transect C (wet, dry)	1.2727	0.042	997
																																														Transect D (wet, dry)	1.3167	0.026	998
																																														Transect E (wet, dry)	1.3137	0.021	996
